# Supplementary material for: ArchLips: A comprehensive in silico database for high-throughput identification of archaeal lipids using high-resolution mass spectrometry
Source: Research Square preprint supplement (doi:10.21203/rs.3.rs-6774005/v1), 2025-07-03
Supplement: Supplementary file 1 [file cb03802b3c57267fb15528db.pdf]

## Supplementary information

### **ArchLips: A comprehensive *in silico* database for high-throughput identification of archaeal lipids using high-resolution mass spectrometry**

Fengfeng Zheng<sup>a,b,1\*</sup>, Wenyong Yao<sup>a, 1</sup>, Wei He<sup>a,1</sup>, Wan Zhang<sup>a</sup>, Yufei Chen<sup>a</sup>, Huahui Chen<sup>a</sup>, Zhirui Zeng<sup>a</sup>, Xiao-Lei Liu<sup>c</sup>, Su Ding<sup>d</sup>, Yanhong Zheng<sup>e</sup>, Linan Huang<sup>f</sup>, Yuanqing Zhu<sup>a</sup>, Chuanlun Zhang<sup>a,\*</sup>

a Shenzhen Key Laboratory of Marine Archaea Geo-Omics, Department of Ocean Science and Engineering, Southern University of Science and Technology, Shenzhen 518055, China

b Advanced Institute for Ocean Research, Southern University of Science and Technology, Shenzhen 518055, China

c School of Geosciences, University of Oklahoma, Norman, OK 73019, USA

d Department of Marine Microbiology and Biogeochemistry, NIOZ Royal Institute for Sea Research, Texel, The Netherlands

e State Key Laboratory of Continental Dynamics, Department of Geology, Northwest University, Xi'an, China

f School of Life Sciences, Sun Yat-sen University, Guangzhou 510275, China

<sup>1</sup> These authors contributed equally to this work

\* Corresponding authors: zhengff@sustech.edu.cn; zhangcl@sustech.edu.cn

**Supplementary Figures 1-14**  
**Supplementary Tables 1-3**

## Supplementary Figures 1-14

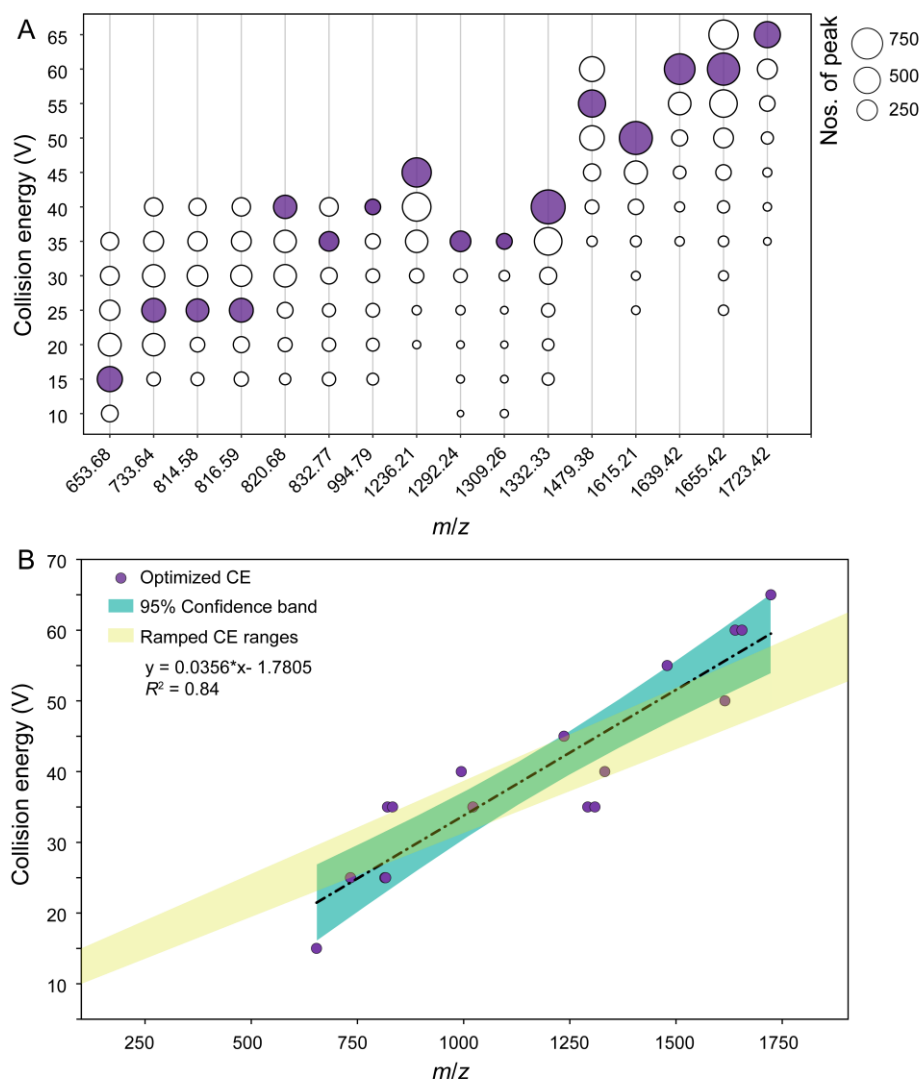

**Figure S1. The collision energy (CE) optimization for collision-induced dissociation (CID) of archaea lipids.** A) The collision energy range was used for cleavage of archaeal lipids; the color (red) of the circles represents the optimized CE values and sizes of the circles indicate the number of product ions with abundance > 0.001% of total peaks in MS<sup>2</sup> spectra; B) Regression of optimized CE verse *m/z* of precursor ions. The optimal energy was chosen as the one that produces the highest number of mass spectral peaks at different collision energies. A ramped CE range was used for data acquisition during the library construction.

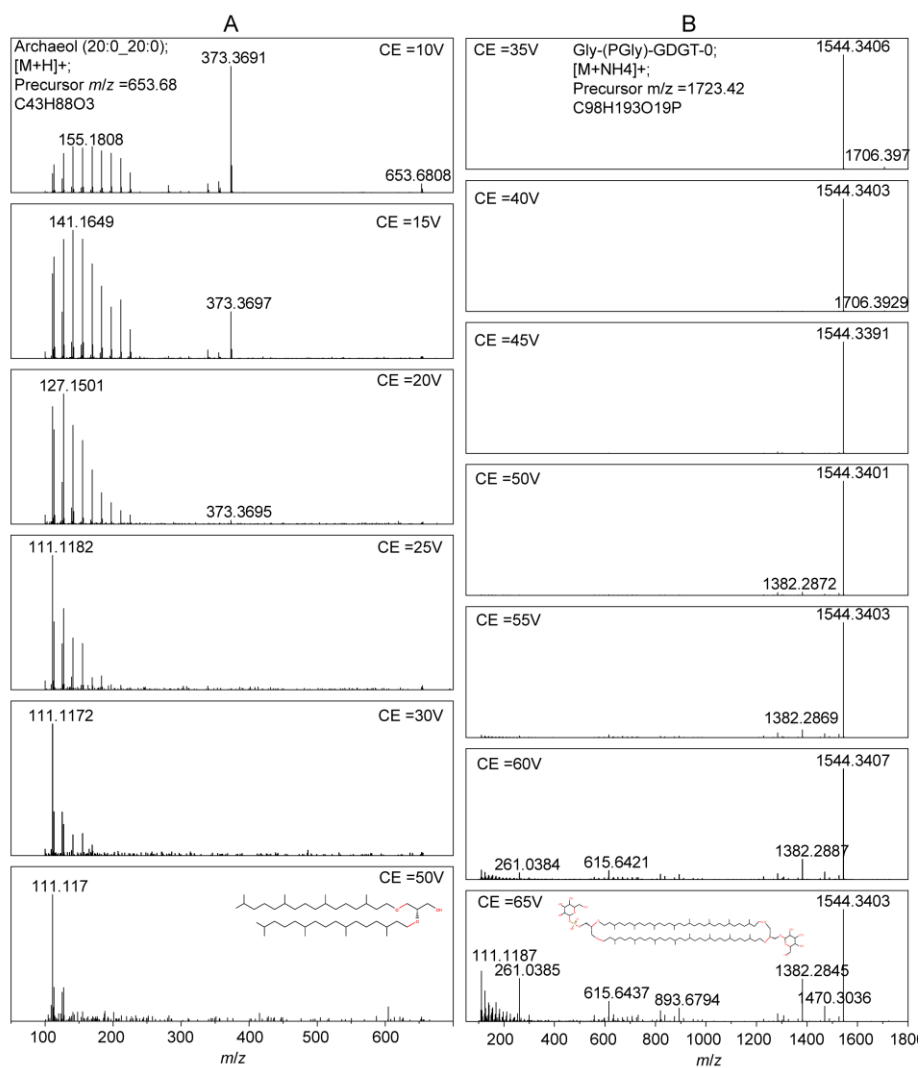

**Figure S2. MS<sup>2</sup> spectra of archaeal lipids obtained under different collision energies (CEs) during CID experiments. A) Archaeol (20:0\_20:0), [M+H]<sup>+</sup> at *m/z* 653.68; B) Gly-(PGly)-GDGT-0, [M+NH<sub>4</sub>]<sup>+</sup> at *m/z* 1723.42.**

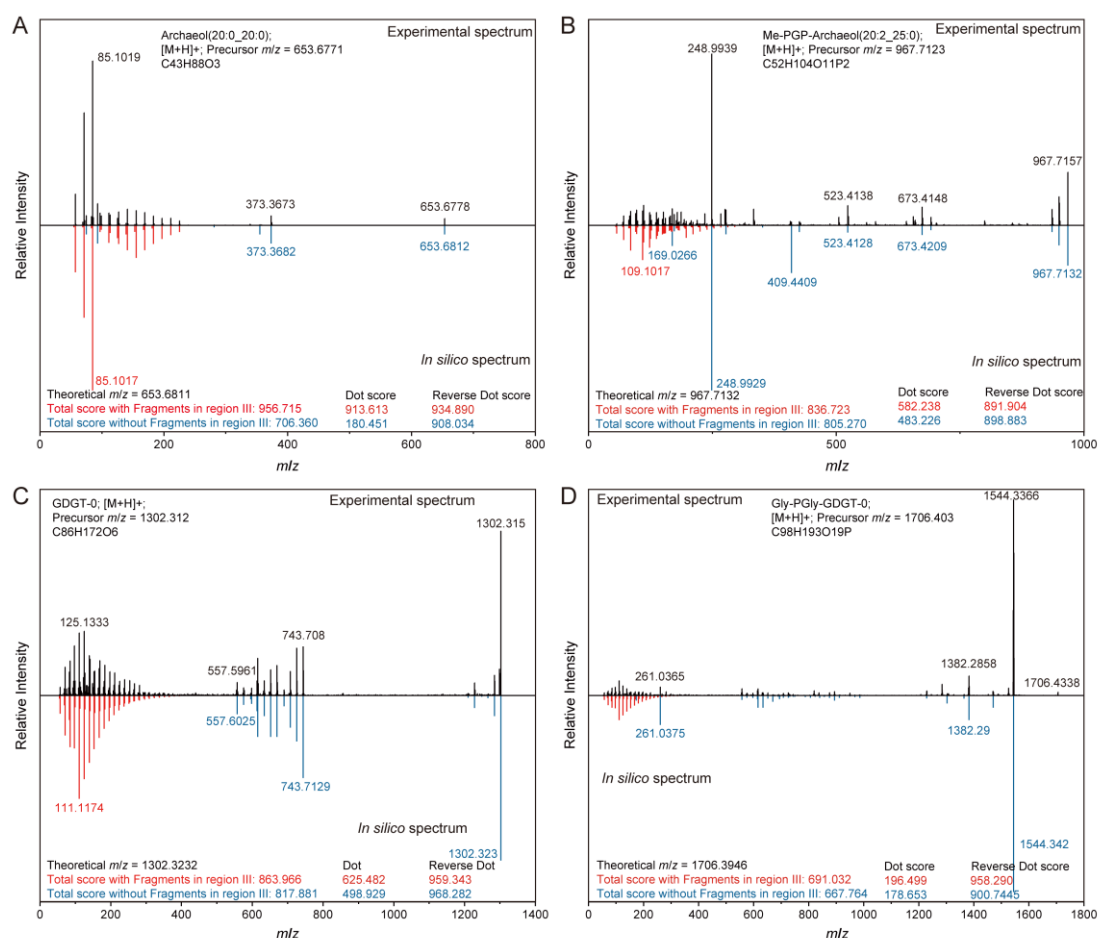

**Figure S3. Effect of including low *m/z* fragment ions (Region III, *m/z* < 300) on spectral matching scores.** A) Archaeol (20:0\_20:0), [M+H]<sup>+</sup>; B) Me-PGP-Archaeol (20:2\_25:0), [M+H]<sup>+</sup>; C) GDGT-0, [M+H]<sup>+</sup>; D) Gly-(PGly)-GDGT-0, [M+H]<sup>+</sup>. Dot score and reverse dot score were calculated using the MS-DIAL software. Fragments with (red) and without (blue) resulting from further cleavage of the carbon chains and polar headgroups. The experimental spectrum is shown at the top (black) and the *in silico* spectrum at the bottom (red and blue).

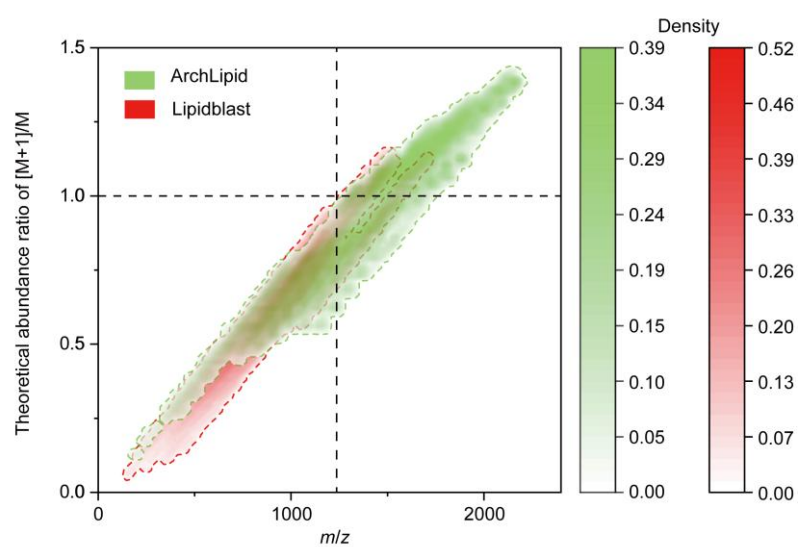

**Figure S4. The theoretical abundance ratio of  $(M+1)/M$  was calculated based on the formula in the LipidBlast library and ArchLips database. Density refers to the distribution of individual lipids with the  $m/z$  values.**

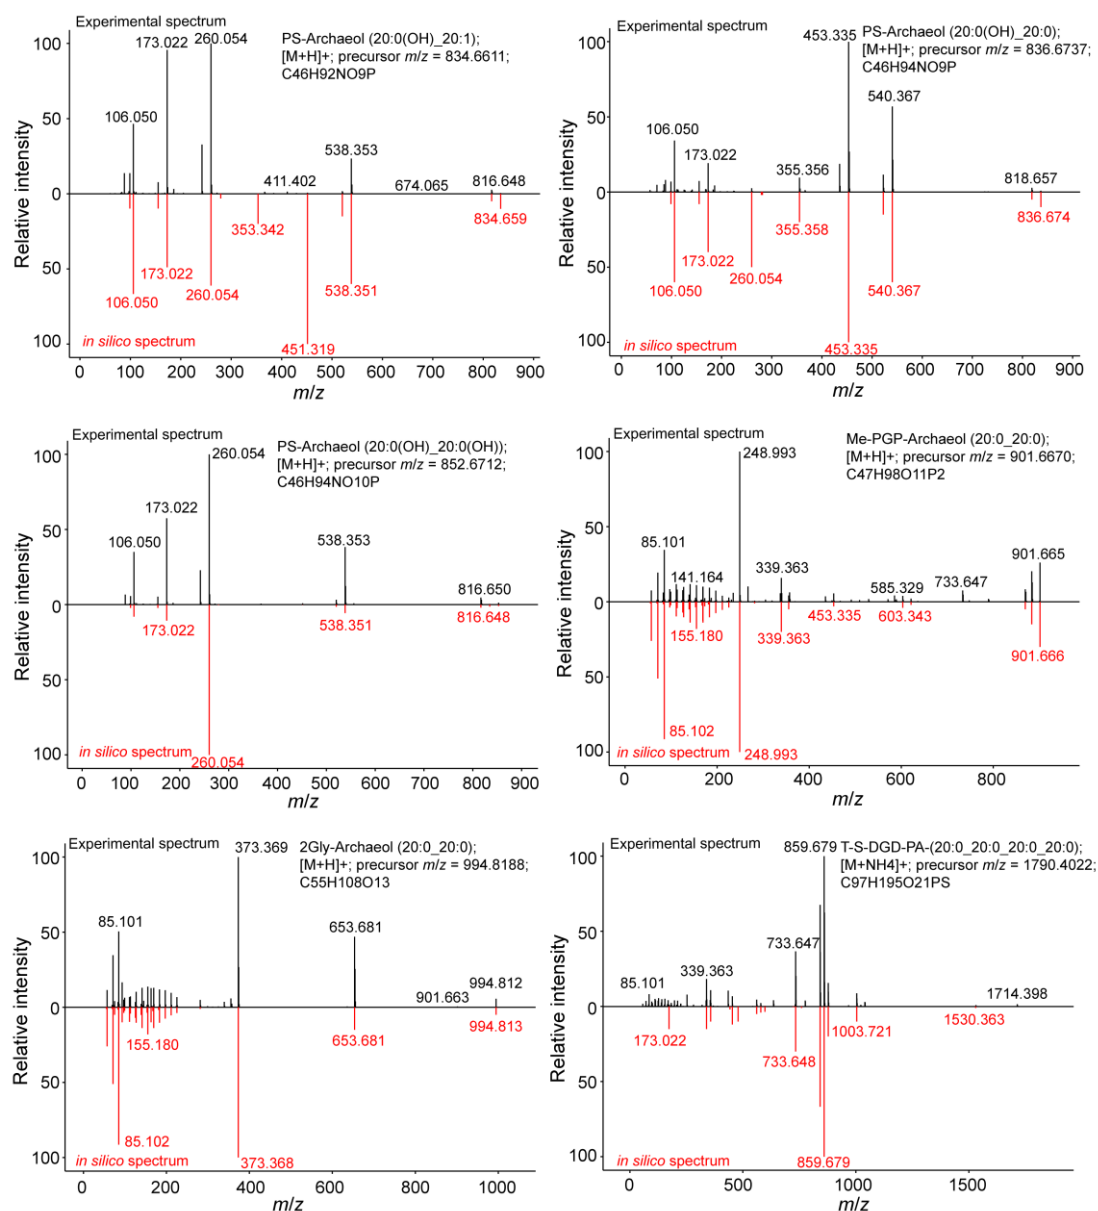

**Figure S5. Examples of MS<sup>2</sup> library identification of archaeal ether lipids.** The *in silico* spectrum in the library is in red (bottom), and the experimental spectrum is in black (top).

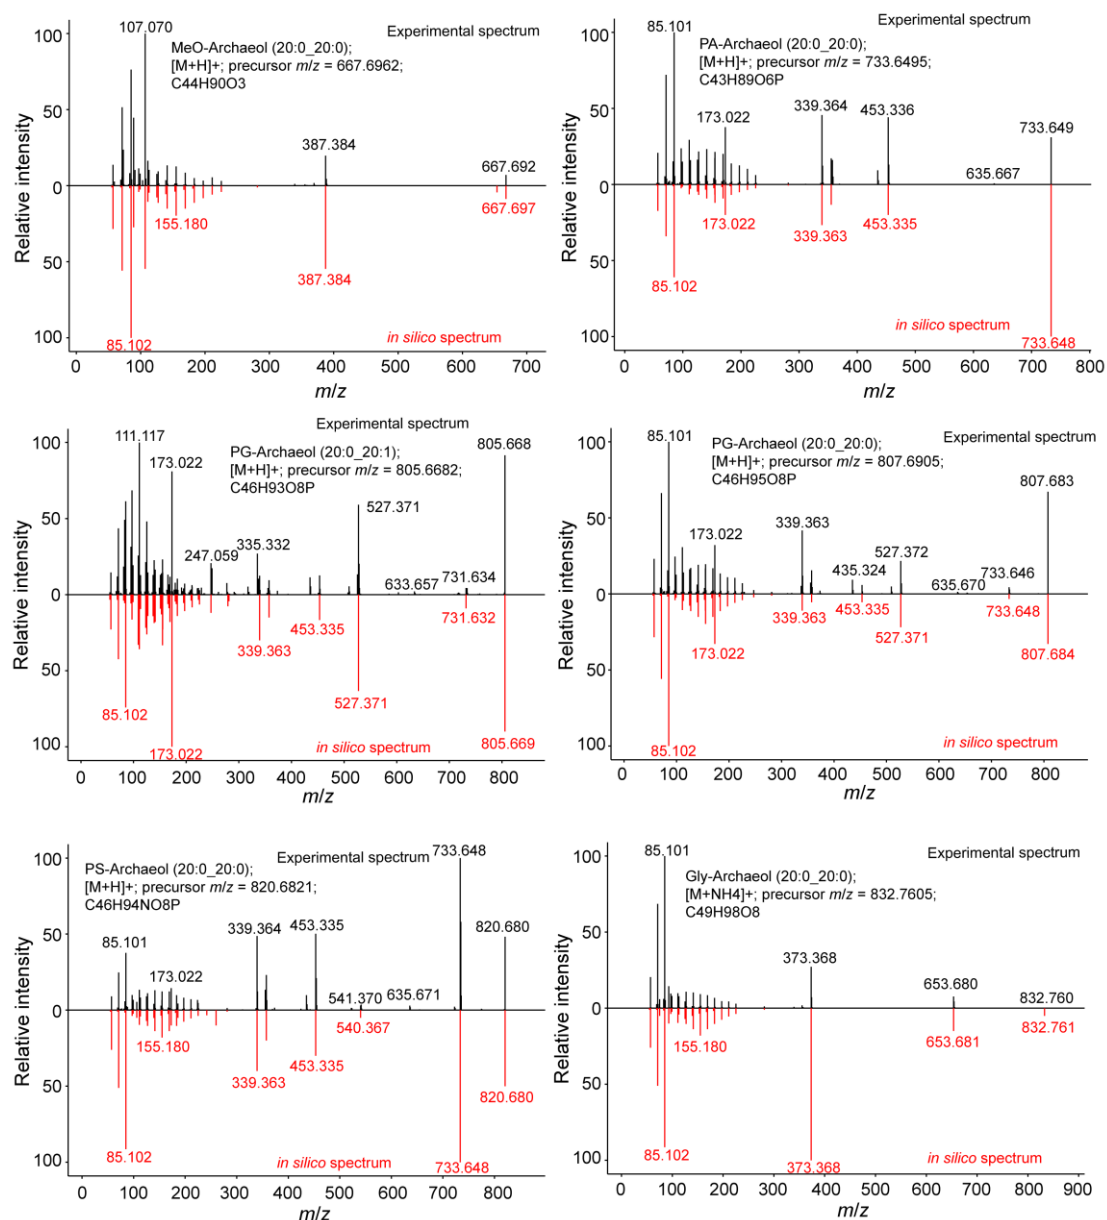

**Figure S6. Examples of MS<sup>2</sup> library identification of archaeal ether lipids.** The *in silico* spectrum in the library is in red (bottom), and the experimental spectrum is in black (top).

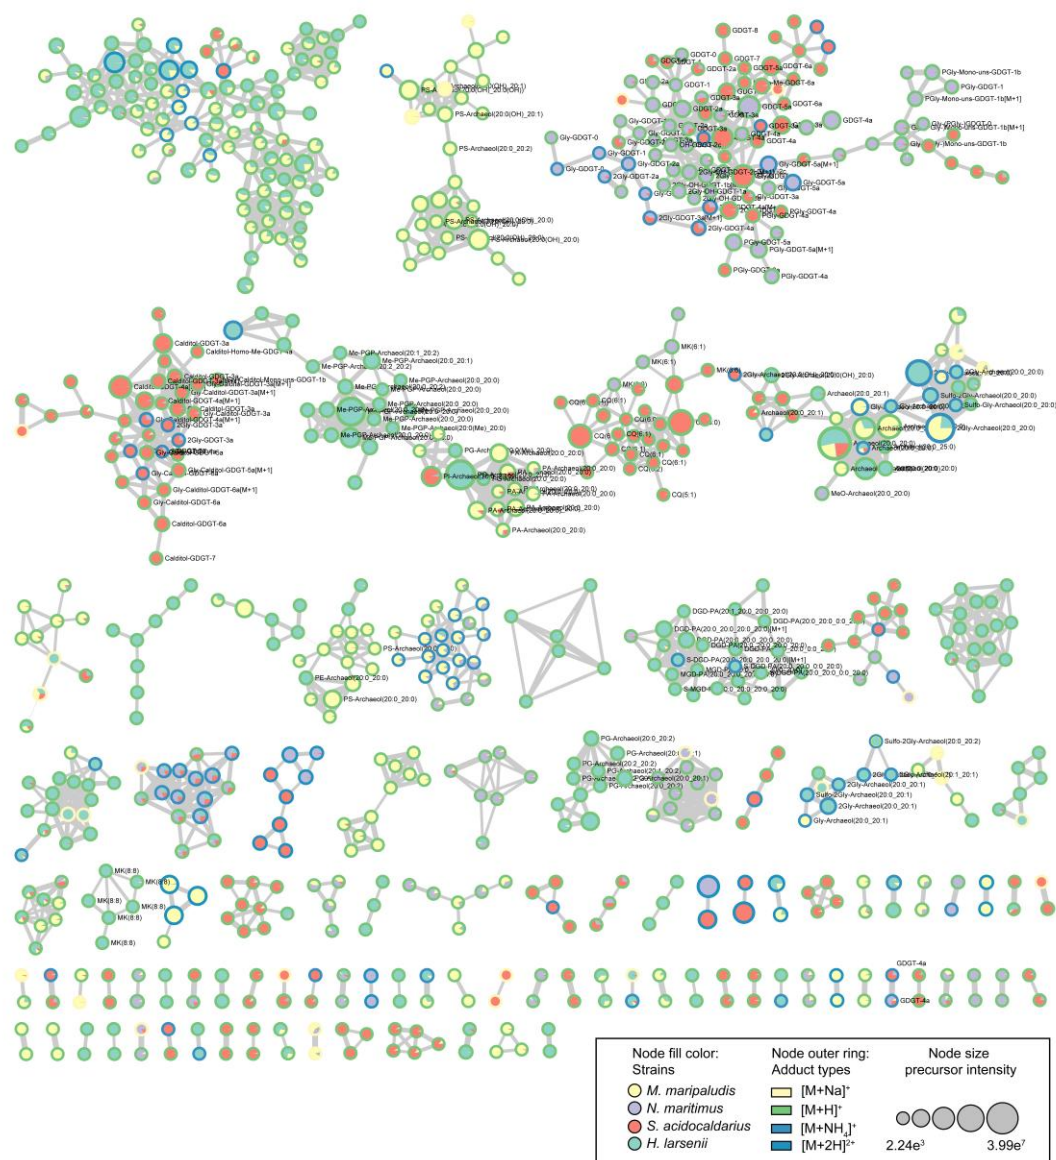

**Figure S7. Feature-based molecular networking (FBMN) based on MS<sup>2</sup> spectra of lipid features of four representative archaeal strains.** The singleton clusters with node <2 in FBMN were excluded. The filled color of the nodes indicates the distribution of lipid features of the four archaeal strains as shown in the legend, and the color of the outer rings refers to the adduct types. The width of the line connecting the nodes represents the level of mass spectral similarities, with thicker lines indicating greater similarity between the two nodes.



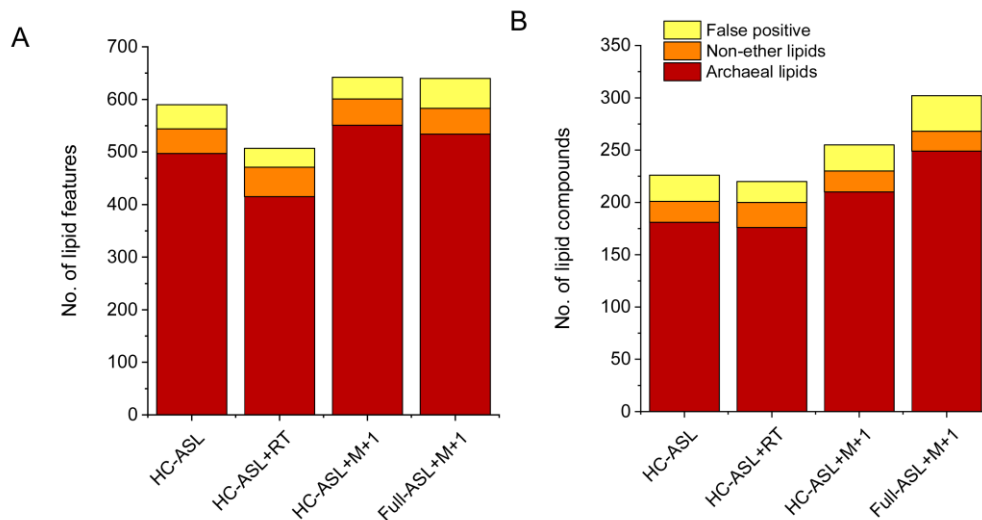

**Figure S8. Number of annotated archaeal lipid features in environmental samples using different spectral libraries, with and without a retention time (RT) tolerance of 3 minutes. A) Number of lipid features annotated. B) Number of lipid compounds annotated.**

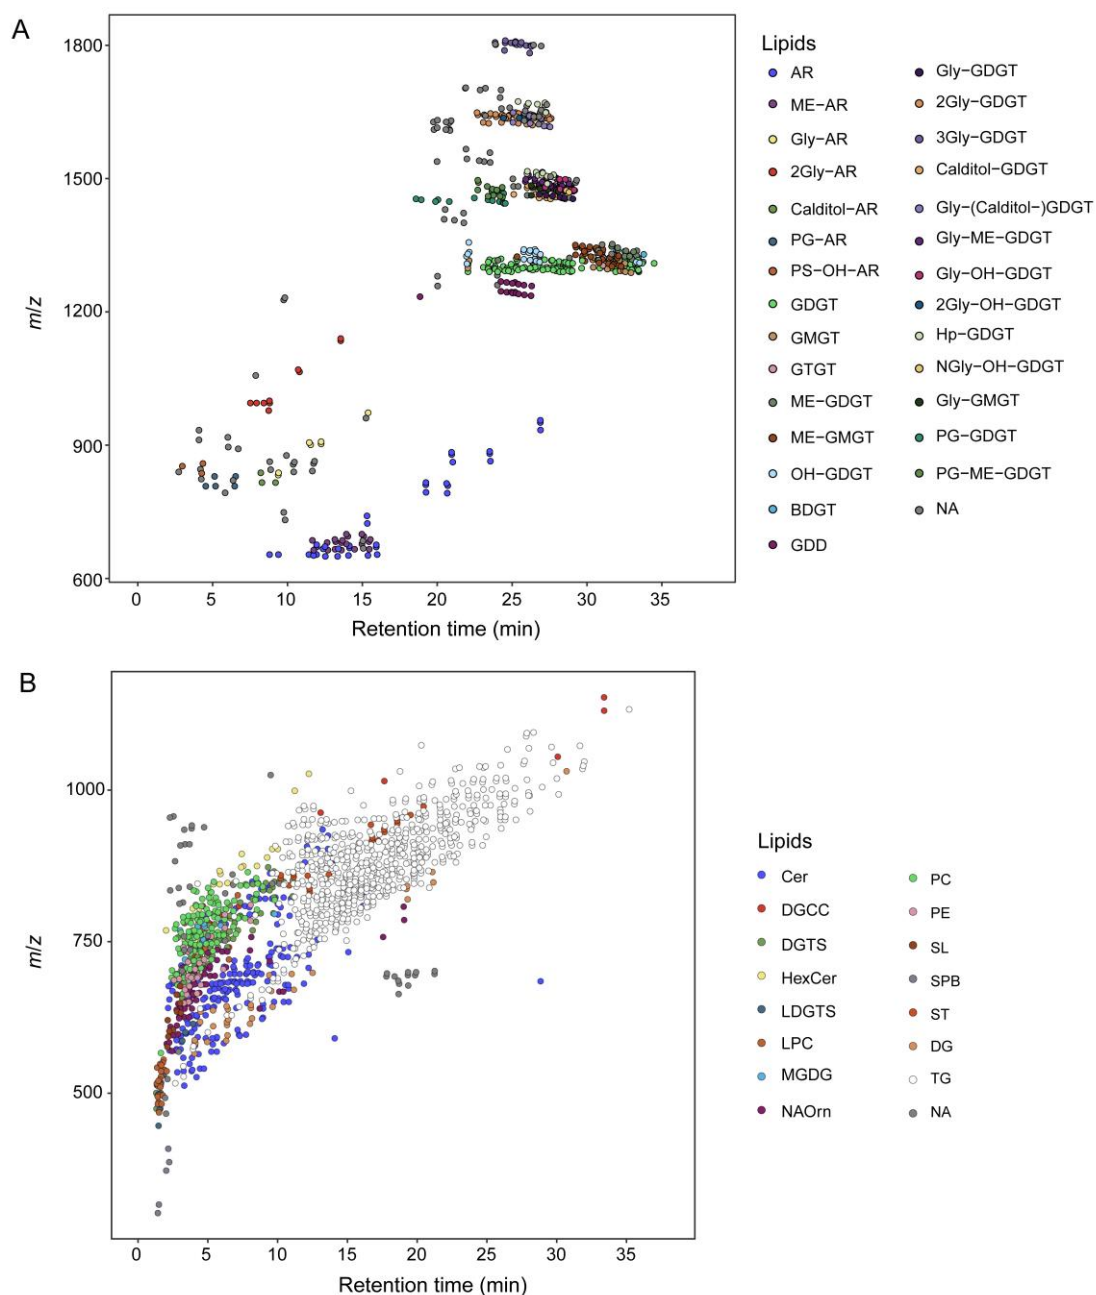

**Figure S9 Retention time (RT) vs.  $m/z$  plot showing retention time and mass-to-charge ratio ( $m/z$ ) of membrane lipids annotated with spectral matching of environmental samples. A) Archaeal lipids using the ArchLips database; B) bacterial-like lipids using the LipidBlast spectral library.**

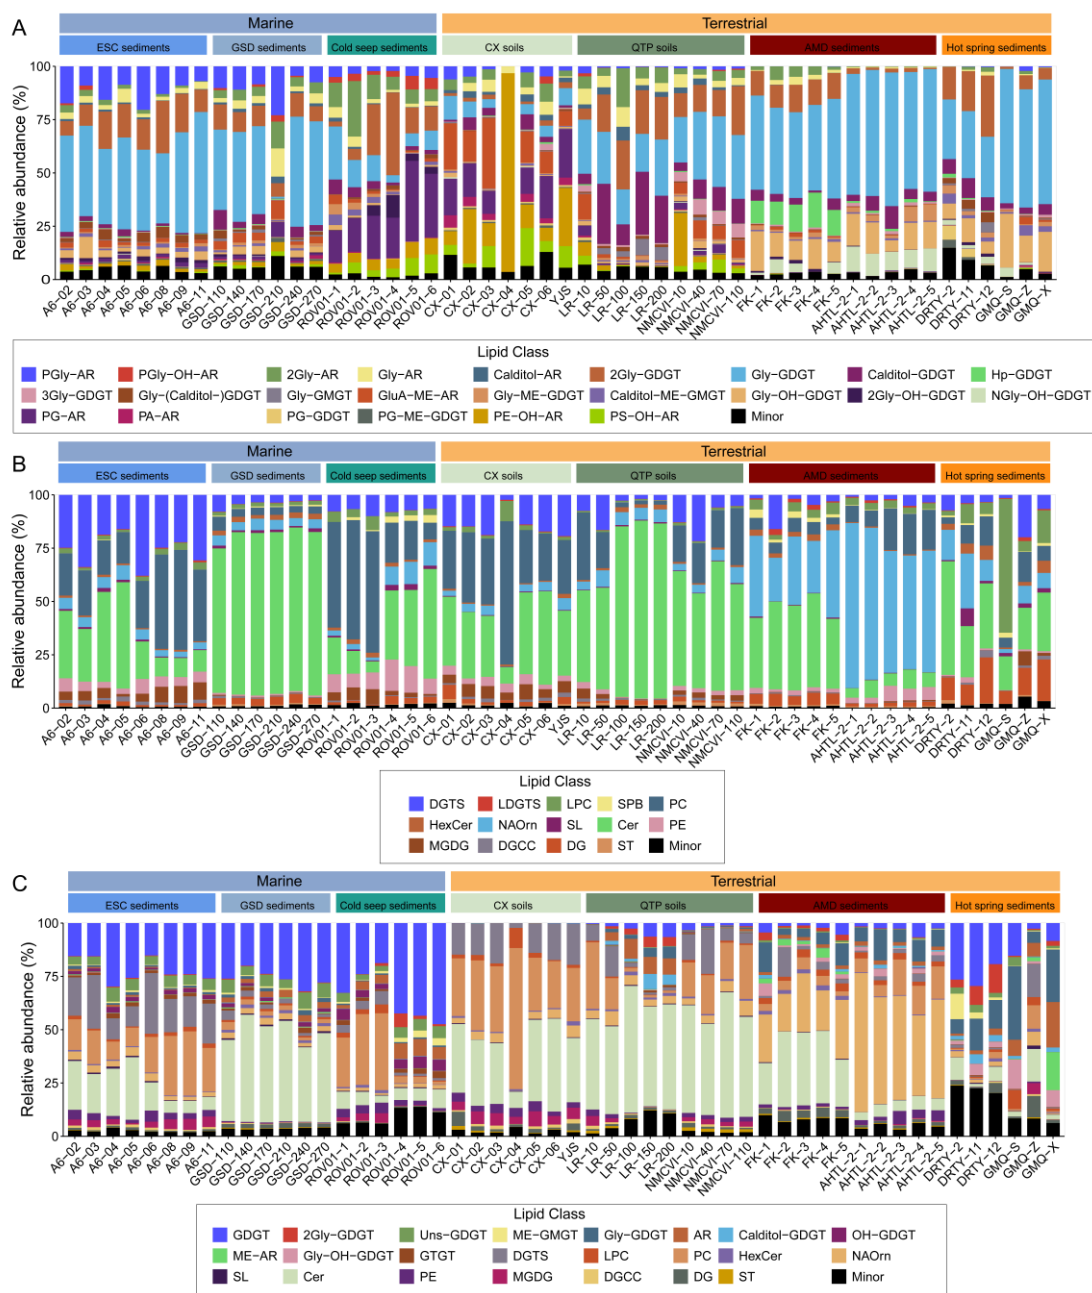

**Figure S10. Relative abundance of archaeal and bacterial-like lipids identified using *in silico* mass spectral libraries across diverse environmental samples. A)** Archaeal intact polar lipids (IPLs) identified using the ArchLips database. **B)** Bacterial-like lipids annotated with the LipidBlast library. **C)** Comprehensive environmental lipidomic profiles combining archaeal and bacterial-like membrane lipids.

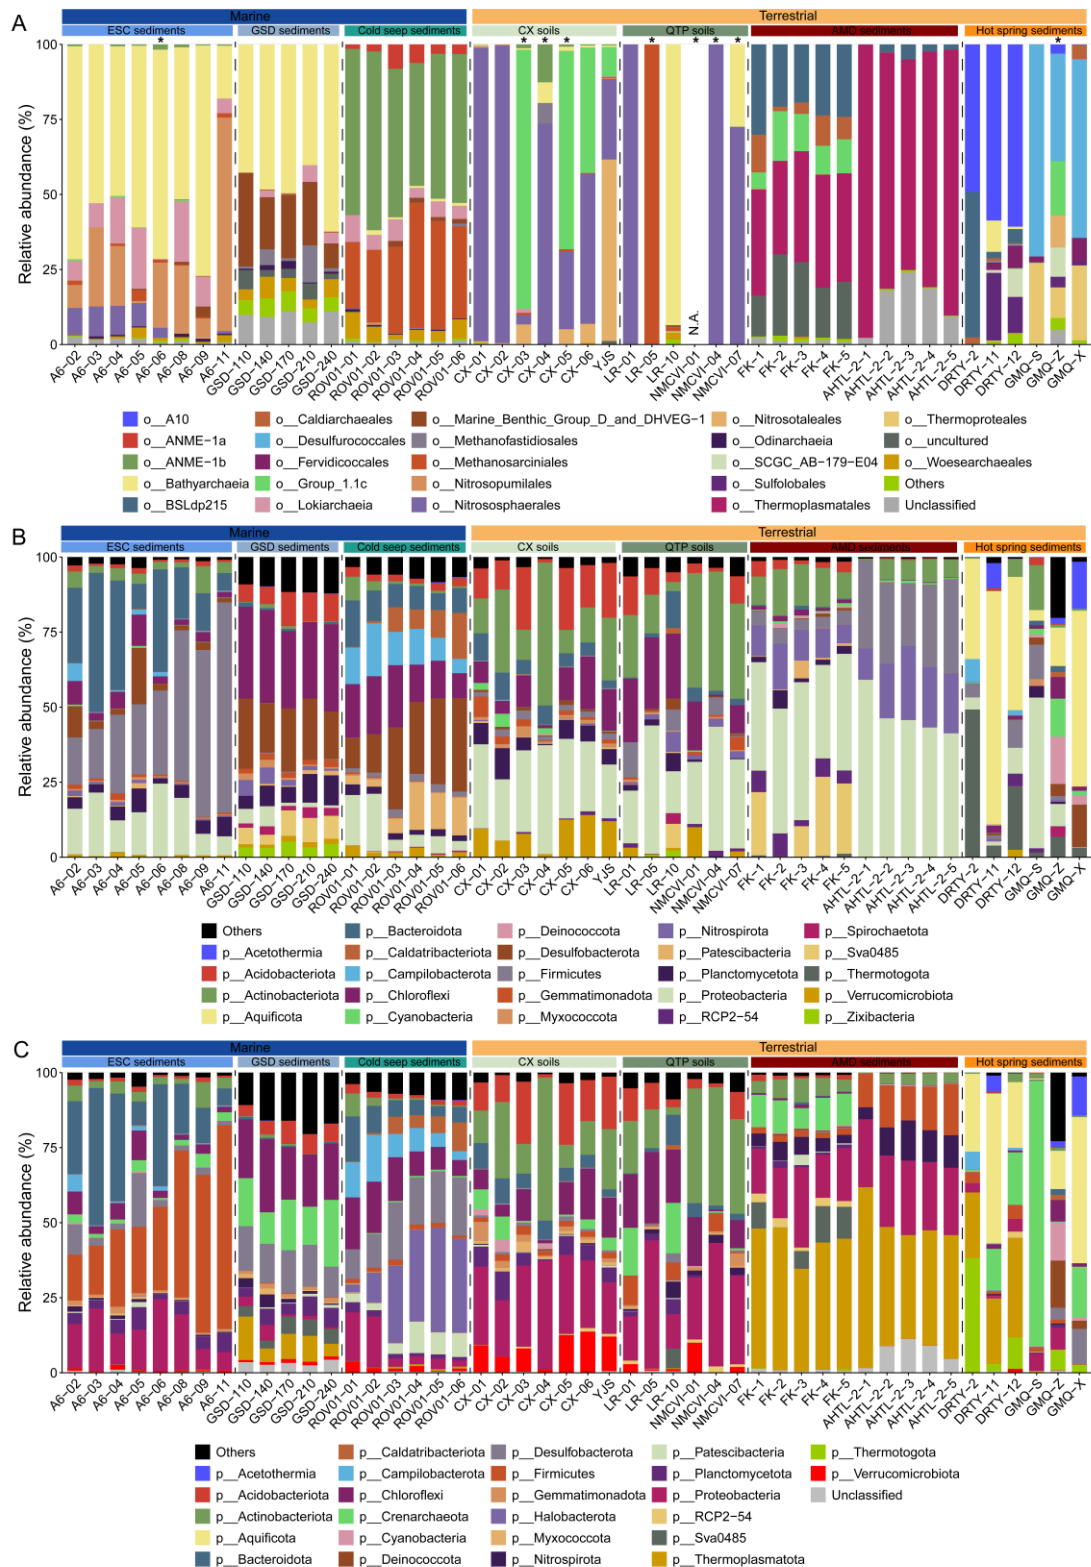

**Figure S11. Relative abundance of archaeal and bacterial community identified using 16S rRNA sequencing with the 515F/806R primers across diverse environmental samples. A) Archaeal community composition. B) Bacterial community composition. C) Overall microbial community consisted of both archaeal and bacteria. An “\*” indicates sample where archaeal read counts were fewer than 1,000.**

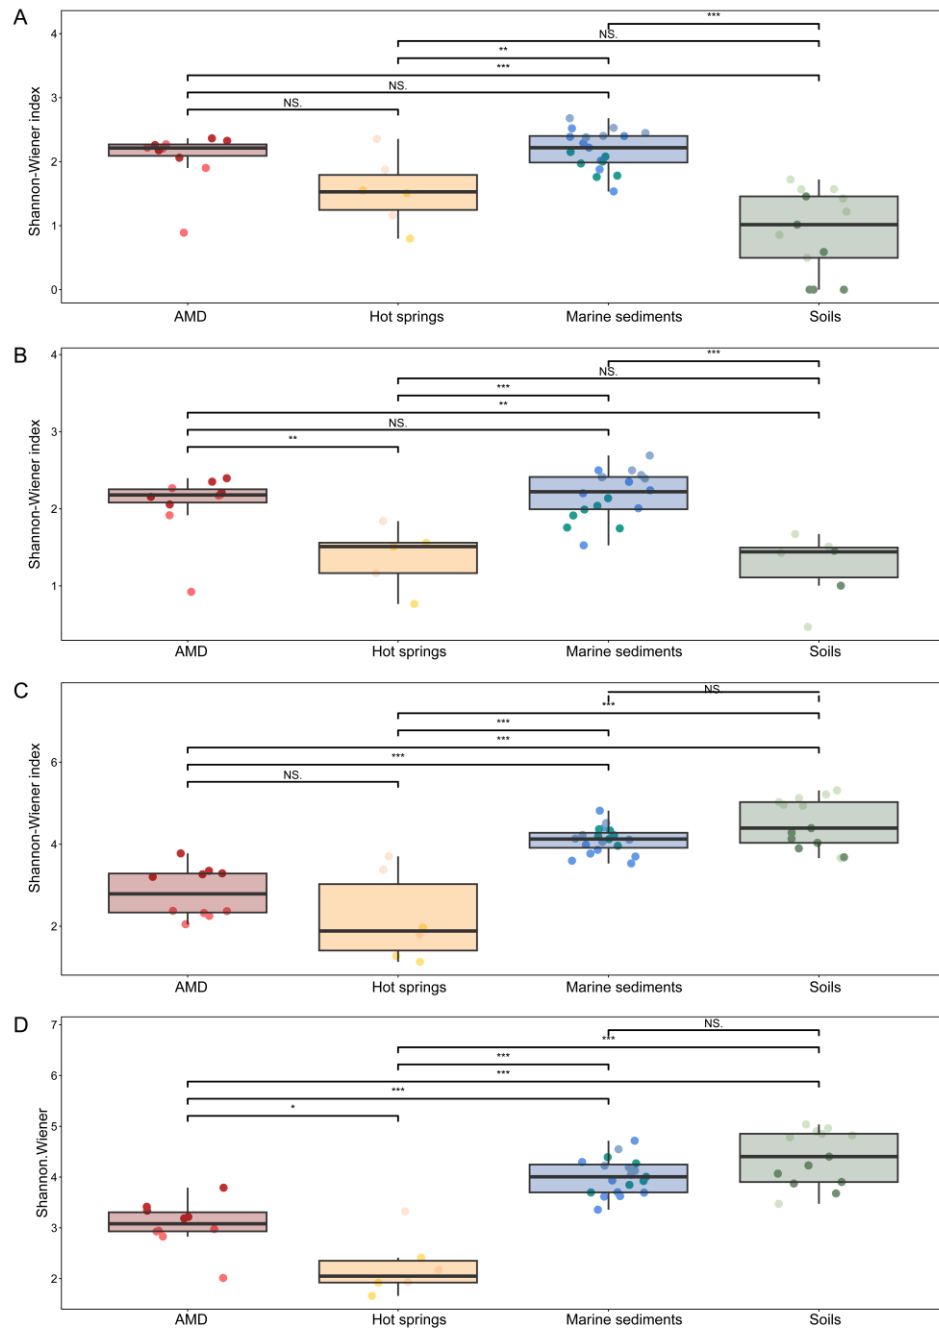

**Figure S12 Microbial diversity of environmental samples.** A) Shannon Wiener index of the archaeal community using all detected sequences. B) Shannon Wiener index of archaeal community calculated after the archaeal sequences were normalized to 1,000. C) Shannon's Wiener index of bacterial community. D) Overall microbial community includes archaeal and bacterial sequences. NS., not significant. The “\*” indicates the significance level.

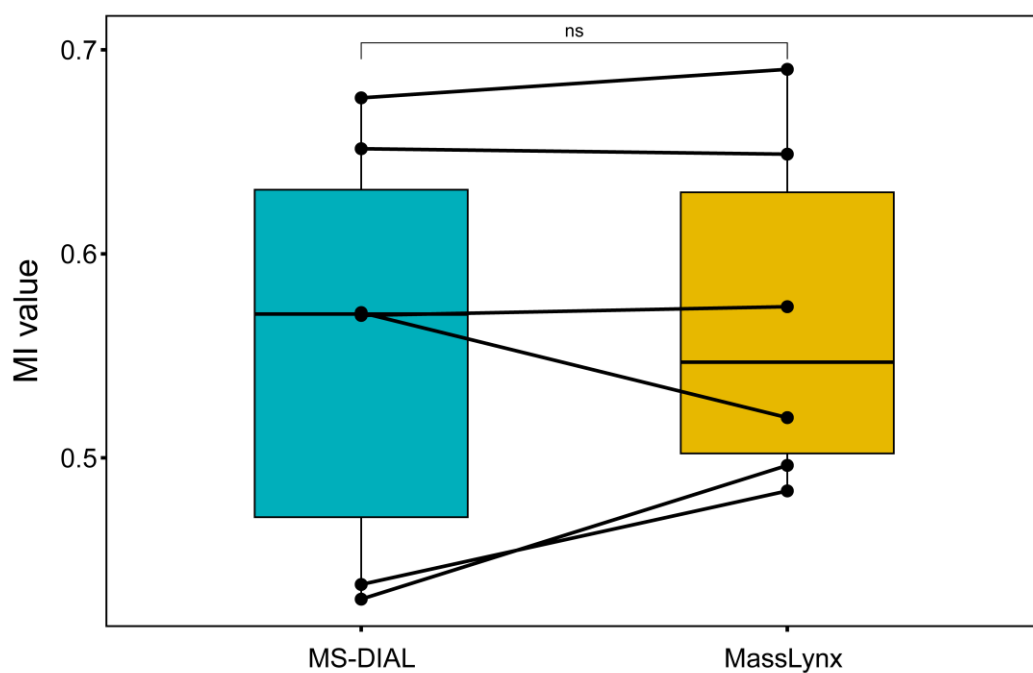

**Figure S13. Boxplots comparing the Methane index (MI) calculated using the data automatically processed using MS-DIAL software and manual integration using the MassLynx software.** A paired t-test was used with a significance level of  $p < 0.05$ . Three adducts of  $[M+H]^+$ ,  $[M+NH_4]^+$ , and  $[M+Na]^+$  were used, and the peak area was merged for proxy calculation.

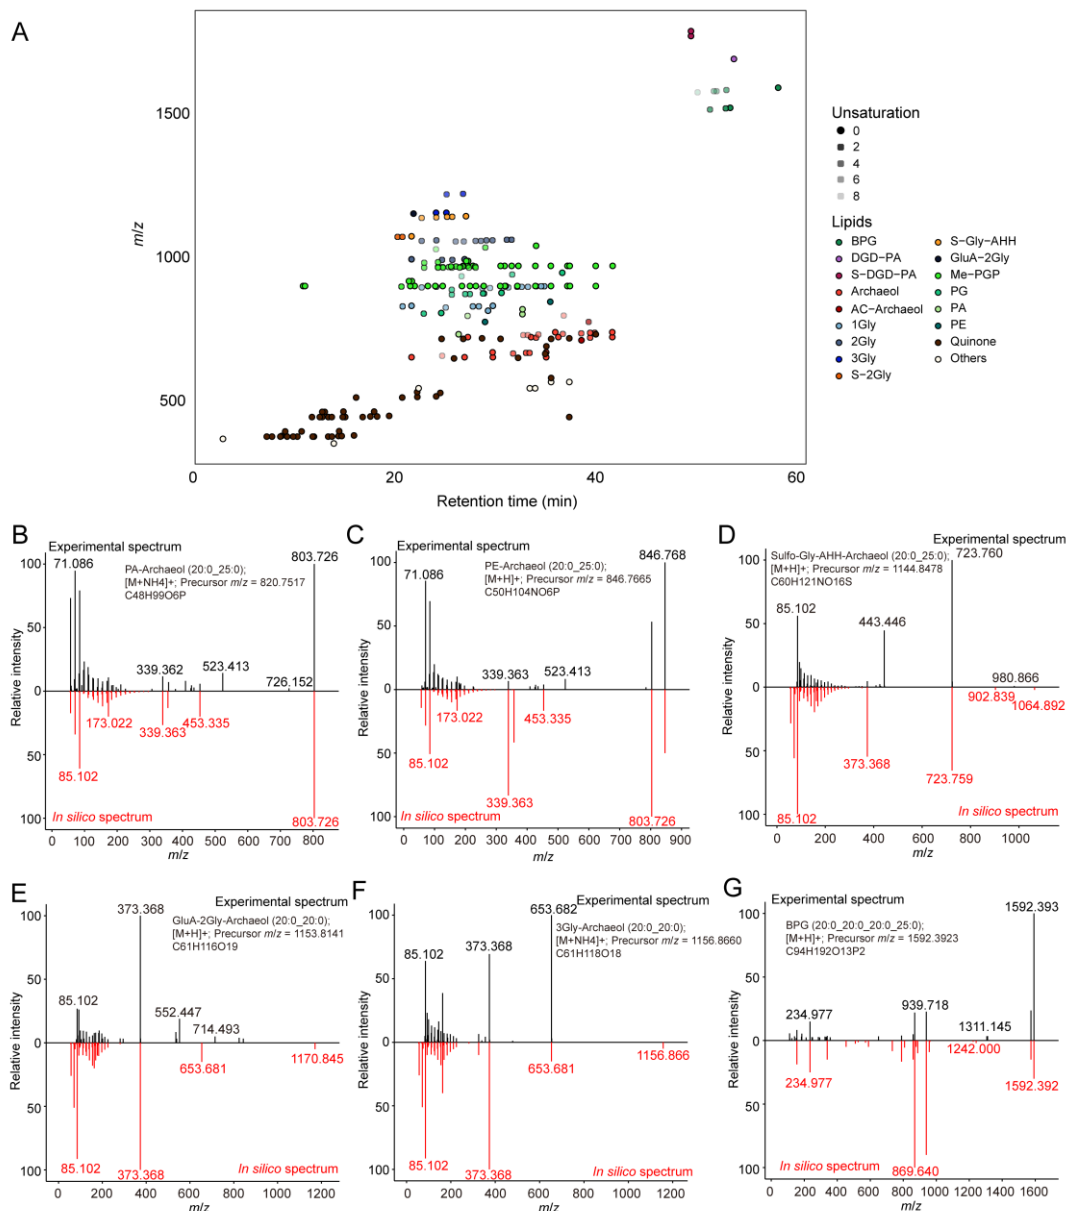

**Figure S14. High-throughput lipid identification using the ArchLips database on a lipidomic dataset from four halobacterial strains analyzed with an Orbitrap MS platform<sup>1,2</sup>.** A) Retention time (RT) vs.  $m/z$  plot showing annotated lipid classes across the four halobacterial strains. Spectral matching of experimental MS<sup>2</sup> spectra (black, top) against referenced *in silico* spectra from the ArchLips database (red, bottom) for representative archaeal lipids.

### Supplementary Tables 1-3

**Table S1. Environmental sample information.**

| Region                    | Sample Name | Sample types       | Layers     | Sampling date | Longitude (E) | Latitude (N) | Altitude <sup>(a)</sup> /Water depth (m) | pH   | References       |
|---------------------------|-------------|--------------------|------------|---------------|---------------|--------------|------------------------------------------|------|------------------|
| Western region of Sichuan | CX-01       | Soil               | Surface    | 2023.6        | 102.880       | 30.961       | 3867 <sup>(a)</sup>                      | 7.1  | This study       |
| Western region of Sichuan | CX-02       | Soil               | Surface    | 2023.6        | 101.868       | 30.915       | 2409 <sup>(a)</sup>                      | 7.6  | This study       |
| Western region of Sichuan | CX-03       | Soil               | Surface    | 2023.6        | 101.619       | 30.529       | 3541 <sup>(a)</sup>                      | 5.9  | This study       |
| Western region of Sichuan | CX-04       | Soil               | Surface    | 2023.6        | 101.540       | 30.431       | 3578 <sup>(a)</sup>                      | 8.1  | This study       |
| Western region of Sichuan | CX-05       | Soil               | Surface    | 2023.6        | 101.641       | 30.183       | 3735 <sup>(a)</sup>                      | 6.4  | This study       |
| Western region of Sichuan | CX-06       | Soil               | Surface    | 2023.6        | 101.588       | 30.211       | 4211 <sup>(a)</sup>                      | 5.9  | This study       |
| Wuhan                     | YJS         | Soil               | Surface    | 2016.9        | 114.435       | 30.514       | -                                        | 5.1  | This study       |
| Qinghai-Tibetan plateau   | LR-01       | Soil               | Subsurface | 2018.7        | 91.230        | 30.524       | 4243 <sup>(a)</sup>                      | 7.3  | Tang et al.,2023 |
| Qinghai-Tibetan plateau   | LR-05       | Soil               | Subsurface | 2018.7        | 91.230        | 30.524       | 4243 <sup>(a)</sup>                      | 6.3  | Tang et al.,2023 |
| Qinghai-Tibetan plateau   | LR-10       | Soil               | Subsurface | 2018.7        | 91.230        | 30.524       | 4243 <sup>(a)</sup>                      | 5.9  | Tang et al.,2023 |
| Qinghai-Tibetan plateau   | NMCVI-01    | Soil               | Subsurface | 2018.7        | 91.040        | 30.719       | 4845 <sup>(a)</sup>                      | 7.1  | Tang et al.,2023 |
| Qinghai-Tibetan plateau   | NMCVI-04    | Soil               | Subsurface | 2018.7        | 91.040        | 30.719       | 4845 <sup>(a)</sup>                      | 7.8  | Tang et al.,2023 |
| Qinghai-Tibetan plateau   | NMCVI-07    | Soil               | Subsurface | 2018.7        | 91.040        | 30.719       | 4845 <sup>(a)</sup>                      | 7.6  | Tang et al.,2023 |
| Tengchong                 | DRTY-2      | Hot spring         | Surface    | 2019.7        | 98.438        | 24.954       | -                                        | 3.0  | This study       |
| Tengchong                 | DRTY-11     | Hot spring         | Surface    | 2019.7        | 98.437        | 24.954       | -                                        | 4.0  | This study       |
| Tengchong                 | DRTY-12     | Hot spring         | Surface    | 2019.7        | 98.437        | 24.954       | -                                        | 5.0  | This study       |
| Tengchong                 | GMQ-S       | Hot spring         | Surface    | 2019.7        | 98.436        | 24.951       | -                                        | 9.0  | This study       |
| Tengchong                 | GMQ-Z       | Hot spring         | Surface    | 2019.7        | 98.436        | 24.951       | -                                        | 9.0  | This study       |
| Tengchong                 | GMQ-X       | Hot spring         | Surface    | 2019.7        | 98.436        | 24.951       | -                                        | 10.0 | This study       |
| Fankou AMD                | FK-1        | Acid mine drainage | Surface    | 2017.9        | 113.663       | 25.049       | -                                        | 3.1  | Hao et al., 2022 |
| Fankou AMD                | FK-2        | Acid mine drainage | Surface    | 2017.9        | 113.664       | 25.049       | -                                        | 2.5  | Hao et al., 2022 |



|                 |          |                    |            |         |         |        |      |      |                    |
|-----------------|----------|--------------------|------------|---------|---------|--------|------|------|--------------------|
| Fankou AMD      | FK-3     | Acid mine drainage | Surface    | 2017.9  | 113.664 | 25.049 | -    | 5.5  | Hao et al., 2022   |
| Fankou AMD      | FK-4     | Acid mine drainage | Surface    | 2017.9  | 113.664 | 25.049 | -    | 3.0  | Hao et al., 2022   |
| Fankou AMD      | FK-5     | Acid mine drainage | Surface    | 2017.9  | 113.663 | 25.050 | -    | 2.6  | Hao et al., 2022   |
| Tongling AMD    | AHTL-2-1 | Acid mine drainage | Surface    | 2017.10 | 117.992 | 30.945 | -    | 2.5  | Hao et al., 2022   |
| Tongling AMD    | AHTL-2-2 | Acid mine drainage | Surface    | 2017.10 | 117.993 | 30.945 | -    | 2.6  | Hao et al., 2022   |
| Tongling AMD    | AHTL-2-3 | Acid mine drainage | Surface    | 2017.10 | 117.993 | 30.946 | -    | 2.6  | Hao et al., 2022   |
| Tongling AMD    | AHTL-2-4 | Acid mine drainage | Surface    | 2017.10 | 117.992 | 30.946 | -    | 2.6  | Hao et al., 2022   |
| Tongling AMD    | AHTL-2-5 | Acid mine drainage | Surface    | 2017.10 | 117.994 | 30.945 | -    | 2.6  | Hao et al., 2022   |
| East China Sea  | A6-02    | Marine             | Surface    | 2015.8  | 122.237 | 30.951 | 8    | N.A. | Chen et al., 2024  |
| East China Sea  | A6-03    | Marine             | Surface    | 2015.8  | 122.382 | 30.909 | 12   | N.A. | Chen et al., 2024  |
| East China Sea  | A6-04    | Marine             | Surface    | 2015.8  | 122.502 | 30.869 | 18   | 8.0  | Chen et al., 2024  |
| East China Sea  | A6-05    | Marine             | Surface    | 2015.8  | 122.649 | 30.821 | 44   | N.A. | Chen et al., 2024  |
| East China Sea  | A6-06    | Marine             | Surface    | 2015.8  | 122.807 | 30.773 | 30   | N.A. | Chen et al., 2024  |
| East China Sea  | A6-08    | Marine             | Surface    | 2015.8  | 123.249 | 30.638 | 59   | 8.0  | Chen et al., 2024  |
| East China Sea  | A6-09    | Marine             | Surface    | 2015.8  | 123.500 | 30.559 | 53   | N.A. | Chen et al., 2024  |
| East China Sea  | A6-11    | Marine             | Surface    | 2015.8  | 124.000 | 30.408 | 45   | N.A. | Chen et al., 2024  |
| South China Sea | ROV01-01 | Cold seep          | Subsurface | 2020.5  | 110.782 | 17.945 | 1736 | 7.7  | Zhang et al., 2023 |
| South China Sea | ROV01-02 | Cold seep          | Subsurface | 2020.5  | 110.782 | 17.945 | 1736 | 7.7  | Zhang et al., 2023 |
| South China Sea | ROV01-03 | Cold seep          | Subsurface | 2020.5  | 110.782 | 17.945 | 1736 | 7.9  | Zhang et al., 2023 |
| South China Sea | ROV01-04 | Cold seep          | Subsurface | 2020.5  | 110.782 | 17.945 | 1736 | 7.9  | Zhang et al., 2023 |
| South China Sea | ROV01-05 | Cold seep          | Subsurface | 2020.5  | 110.782 | 17.945 | 1736 | 7.9  | Zhang et al., 2023 |
| South China Sea | ROV01-06 | Cold seep          | Subsurface | 2020.5  | 110.782 | 17.945 | 1736 | 7.9  | Zhang et al., 2023 |
| Pearl River     | GSD-110  | Marine             | Subsurface | 2017.10 | 113.806 | 22.132 | 21   | N.A. | Wang et al., 2020  |
| Pearl River     | GSD-140  | Marine             | Subsurface | 2017.10 | 113.806 | 22.132 | 21   | N.A. | Wang et al., 2020  |
| Pearl River     | GSD-170  | Marine             | Subsurface | 2017.10 | 113.806 | 22.132 | 21   | N.A. | Wang et al., 2020  |
| Pearl River     | GSD-210  | Marine             | Subsurface | 2017.10 | 113.806 | 22.132 | 21   | N.A. | Wang et al., 2020  |
| Pearl River     | GSD-240  | Marine             | Subsurface | 2017.10 | 113.806 | 22.132 | 21   | N.A. | Wang et al., 2020  |

**Table S2. Head groups in the ArchLips database.** Y = yes; N = no. Light blue color refers to glycolipids, green color phospholipids, and light yellow other compounds that cannot be classified into either glycolipids or phospholipids.

| Short name   | Full Name                              | IPL-GDGT-IPL | Reported in diether lipids | Reported in tetraether lipids | Formula                                          |
|--------------|----------------------------------------|--------------|----------------------------|-------------------------------|--------------------------------------------------|
| Gly          | Glycosyl                               | Y            | Y                          | Y                             | C <sub>6</sub> H <sub>12</sub> O <sub>6</sub>    |
| 2Gly         | Diglycosyl                             | Y            | Y                          | Y                             | C <sub>12</sub> H <sub>22</sub> O <sub>11</sub>  |
| 3Gly         | Triglycosyl                            | N            | Y                          | Y                             | C <sub>18</sub> H <sub>32</sub> O <sub>16</sub>  |
| 4Gly         | Tetraglycosyl                          | N            | N                          | Y                             | C <sub>24</sub> H <sub>42</sub> O <sub>21</sub>  |
| Calditol     | Calditol                               | Y            | N                          | Y                             | C <sub>6</sub> H <sub>12</sub> O <sub>6</sub>    |
| Gly-Calditol | Glycosyl-calditol                      | N            | N                          | Y                             | C <sub>12</sub> H <sub>22</sub> O <sub>11</sub>  |
| DeoxyGly     | Deoxyglycosyl                          | N            | Y                          | Y                             | C <sub>6</sub> H <sub>12</sub> O <sub>5</sub>    |
| G-2Gly       | Glycerolglycosyl-glycosyl              | Y            | Y                          | N                             | C <sub>15</sub> H <sub>28</sub> O <sub>13</sub>  |
| G-Gly-NAcGly | Glycerolglycosyl-(N)-acetylglycosaminy | N            | N                          | N                             | C <sub>17</sub> H <sub>31</sub> NO <sub>13</sub> |
| GluA         | Glucuronic acid                        | Y            | N                          | N                             | C <sub>6</sub> H <sub>10</sub> O <sub>7</sub>    |
| GluA-Gly     | Glucuronic acid-glycosyl               | N            | N                          | N                             | C <sub>12</sub> H <sub>20</sub> O <sub>12</sub>  |
| GluA-2Gly    | Glucuronic acid-diglycosyl             | N            | N                          | N                             | C <sub>18</sub> H <sub>30</sub> O <sub>17</sub>  |
| Hp           | Heptosyl                               | N            | N                          | N                             | C <sub>7</sub> H <sub>14</sub> O <sub>7</sub>    |
| Hp-Gly       | Heptosyl-glycosyl                      | N            | N                          | Y                             | C <sub>13</sub> H <sub>24</sub> O <sub>12</sub>  |

|                |                                       |   |   |   |              |
|----------------|---------------------------------------|---|---|---|--------------|
| MeOGly         | Methoxylated glycosyl                 | N | N | N | C7H14O6      |
| MeOGly-Gly     | Methoxylated glycosyl-glycosyl        | N | Y | N | C13H24O11    |
| MeOGly-2Gly    | Methoxylated glycosyl-diglycosyl      | N | Y | N | C19H34O16    |
| NGly           | GlycosaminyI                          | Y | N | N | C6H13NO5     |
| NAcGly         | N-acetylglucosaminyI                  | Y | Y | N | C8H15NO6     |
| Ac-2Gly        | Acetylglucosyl-glycosyl               | N | Y | N | C14H24O12    |
| G-Gly-AcGly    | Glycerolglucosyl-acetylglucosyl       | N | Y | N | C17H30O14    |
| Sulfo-Gly      | Sulphated glycosyl                    | N | N | N | C6H12O9S     |
| Sulfo-2Gly     | Sulfated diglycosyl                   | Y | Y | N | C12H22O14S   |
| Sulfo-3Gly     | Sulfated triglycosyl                  | N | Y | N | C18H32O19S   |
| 2Sulfo-Gly     | Disulfate-glycosyl                    | N | N | N | C6H12O12S2   |
| 2Sulfo-2Gly    | Disulfate-diglycosyl                  | N | Y | N | C12H22O17S2  |
| Sulfo-Gly-AHH  | Sulphated glycosyl-aminoheptahexaol   | N | Y | N | C12H25NO14S  |
| 2Sulfo-Gly-AHH | Disulphated glycosyl-aminoheptahexaol | N | Y | N | C12H25NO17S2 |
| SQ             | Sulfoquinovosyl                       | N | N | N | C6H12O8S     |
| SQ-Gly         | Sulfoquinovosyl-glycosyl              | N | N | N | C12H22O13S   |
| SQ-2Gly        | Sulfoquinovosyl-diglycosyl            | N | N | N | C18H32O18S   |

|                |                                               |   |   |   |              |
|----------------|-----------------------------------------------|---|---|---|--------------|
| Sulfo-SQ       | Sulfated sulfoquinovosyl                      | N | N | N | C6H12O11S2   |
| SQ-Sulfo-Gly   | Sulfoquinovosyl-sulphated glycosyl            | N | N | N | C12H22O16S2  |
| SQ-AHH         | Sulfoquinovosyl-aminohexanehexaol             | N | N | N | C12H25NO13S  |
| Sulfo-SQ-AHH   | Sulphated sulfoquinovosyl-aminohexanehexaol   | N | N | N | C12H25NO16S2 |
| Rib            | Ribosyl                                       | N | N | N | C5H10O5      |
| NRib           | N-ribosyl                                     | N | N | N | C5H11NO4     |
| Gly-Rib        | Glycosyl-ribosyl                              | N | N | N | C11H20O10    |
| Gly-PGly       | Glycosyl-phosphatidylglycosyl                 | N | Y | N | C12H23O14P   |
| Gly-PG         | Phosphatidylglycerolhexose                    | Y | Y | N | C9H19O11P    |
| Gly-PI         | Glycosyl-phosphatidylinositol                 | N | Y | N | C12H23O14P   |
| PE-PGly        | Phosphatidylethanolamine-phosphatidylglycosyl | N | Y | N | C8H19NO12P2  |
| APT            | Phosphoaminopentatetrol                       | N | Y | N | C5H14NO7P    |
| N-Me-APT       | N-monomethyl aminopentametrol                 | N | Y | N | C6H16NO7P    |
| N-Me-APT-Me    | N-monomethyl aminomethoxypentanetriol         | N | Y | N | C7H18NO7P    |
| N,N-2Me-APT    | N,N-dimethyl aminopentametrol                 | N | Y | N | C7H18NO7P    |
| N,N-2Me-APT-Me | N,N-dimethyl aminomethoxypentanetriol         | N | Y | N | C8H20NO7P    |
| N,N,N-3Me-APT  | N,N,N-trimethyl aminopentametrol              | N | Y | N | C8H20NO7P    |

|                  |                                           |   |   |   |             |
|------------------|-------------------------------------------|---|---|---|-------------|
| N,N,N-3Me-APT-Me | N,N,N-trimethyl aminomethoxypentaneetriol | N | Y | N | C9H22NO7P   |
| NGly-PI          | Glycosaminyl-phosphatidylinositol         | N | N | N | C12H24NO13P |
| PA               | Phosphatidic acid                         | Y | Y | N | H3O4P       |
| 2Me-PA           | Dimethyl-phosphatidyl acid                | N | N | N | C2H7O4P     |
| PC               | Phosphatidylcholine                       | N | Y | N | C5H14NO4P   |
| PE               | Phosphatidylethanolamine                  | Y | Y | Y | C2H8NO4P    |
| PME              | Phosphatidyl-(N)-methylethanolamine       | N | Y | Y | C3H10NO4P   |
| PDME             | Phosphatidyl-(N,N)-dimethylethanolamine   | N | N | N | C4H12NO4P   |
| PG               | Phosphatidylglycerol                      | Y | Y | Y | C3H9O6P     |
| PGly             | Phosphatidylglycosyl                      | N | Y | Y | C6H13O9P    |
| PGP              | Phosphatidylglycerophosphate              | N | Y | Y | C3H10O9P2   |
| Me-PGP           | Methylated phosphatidylglycerophosphate   | N | Y | N | C4H12O9P2   |
| PI               | Phosphatidylinositol                      | Y | Y | Y | C6H13O9P    |
| NAcGly-P         | N-acetylglycosaminyl-phosphate            | N | Y | N | C8H16NO9P   |
| PPA              | Pyrophosphate acid                        | N | N | N | H4O7P2      |
| Me-PPA           | Methylated pyrophosphatidyl acid          | N | N | N | CH6O7P2     |
| PS               | Phosphatidylserine                        | Y | Y | N | C3H8NO6P    |

|             |                                              |   |   |   |                                                                              |
|-------------|----------------------------------------------|---|---|---|------------------------------------------------------------------------------|
| Gly-PS      | Glycosyl-phosphatidylserine                  | N | Y | N | C <sub>9</sub> H <sub>18</sub> NO <sub>11</sub> P                            |
| Sulfo-PG    | Phosphatidylglycerosulfate                   | N | Y | N | C <sub>3</sub> H <sub>9</sub> O <sub>9</sub> PS                              |
| NGly-PGly   | Glycosaminyl-phosphatidylglycosyl            | N | Y | N | C <sub>12</sub> H <sub>24</sub> NO <sub>13</sub> P                           |
| NAcGly-PGly | N-acetylglycosaminyl-phosphatidylglycosyl    | N | Y | N | C <sub>14</sub> H <sub>26</sub> NO <sub>14</sub> P                           |
| 2NAc-2Gly-P | Di-(N)-acetylglycosaminyl glycosyl phosphate | N | Y | N | C <sub>16</sub> H <sub>29</sub> N <sub>2</sub> O <sub>14</sub> P             |
| PIP         | Phosphatidylinositolphosphate                | N | N | N | C <sub>6</sub> H <sub>14</sub> O <sub>12</sub> P <sub>2</sub>                |
| PIP2        | Phosphatidylinositol-4,5-bisphosphate        | N | N | N | C <sub>6</sub> H <sub>15</sub> O <sub>15</sub> P <sub>3</sub>                |
| PIP3        | Phosphoinositol-3,4,5-trisphosphate          | N | N | N | C <sub>6</sub> H <sub>16</sub> O <sub>18</sub> P <sub>4</sub>                |
| PnC         | Phosphonylcholine                            | N | N | N | C <sub>5</sub> H <sub>14</sub> NO <sub>3</sub> P                             |
| PnE         | Phosphonylethanolamine                       | N | N | N | C <sub>2</sub> H <sub>8</sub> NO <sub>3</sub> P                              |
| CDP         | Cytidine Diphosphate                         | N | Y | N | C <sub>9</sub> H <sub>15</sub> N <sub>3</sub> O <sub>11</sub> P <sub>2</sub> |
| UDP         | Uridine-diphosphate                          | N | N | N | C <sub>9</sub> H <sub>14</sub> N <sub>2</sub> O <sub>12</sub> P <sub>2</sub> |
| MeO         | Methoxylated                                 | Y | Y | Y | CH <sub>4</sub> O                                                            |
| AC          | Acetyl                                       | N | Y | N | C <sub>2</sub> H <sub>4</sub> O <sub>2</sub>                                 |

**Table S3. Annotation of archaeal lipids using the high confidence spectral library(HC-SL) and full spectral library (full-SL) of ArchLips database from LipidBlast and GNPS libraries that contain only bacterial-like lipids.**

| Library    | HC-SL | Full-SL |
|------------|-------|---------|
| Lipidblast | 0.80% | 6.62%   |
| GNPS       | 0.19% | 0.60%   |

## References

1. Sorokin, D.Y. et al. sp. nov. and gen. nov., sp. nov., the first sulfur-respiring alkaliphilic haloarchaea from hypersaline alkaline lakes. *International Journal of Systematic and Evolutionary Microbiology* **69**, 2662–2673 (2019).
2. Sorokin, D.Y. et al. sp. nov., carbohydrate-utilizing, sulfur-respiring haloarchaea from hypersaline lakes. *Systematic and Applied Microbiology* **44**, 126249 (2021).
